# Supplementary material for: PVA reinforced gossypolone and doxorubicin π–π stacking nanoparticles towards tumor targeting and ultralow dose synergistic chemotherapy
Source: Royal Society of Chemistry journal article supplement (doi:10.1039/c9bm00674e), 2019-01-01

Electronic Supplementary Material (ESI) for Biomaterials Science.  
This journal is © The Royal Society of Chemistry 2019

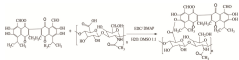

Supplement: c9bm00674e11.pdf [file c9bm00674e11.pdf]
