# Supplementary figures and images for: PVA reinforced gossypolone and doxorubicin π–π stacking nanoparticles towards tumor targeting and ultralow dose synergistic chemotherapy
Source: Royal Society of Chemistry journal article supplement (doi:10.1039/c9bm00674e), 2019-01-01

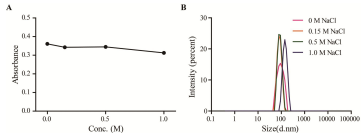

Supplement: c9bm00674e10.pdf [file c9bm00674e10.pdf]

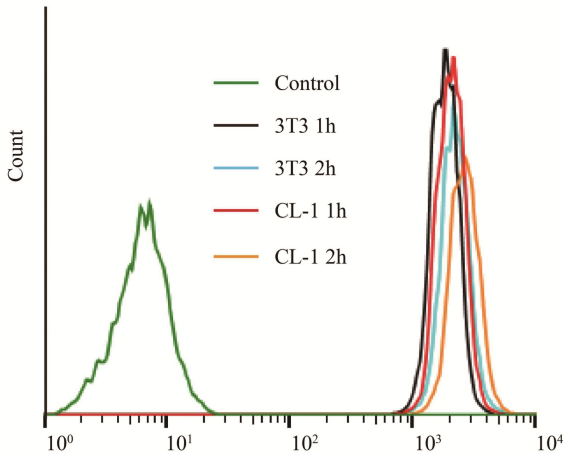

Supplement: c9bm00674e15.pdf [file c9bm00674e15.pdf]

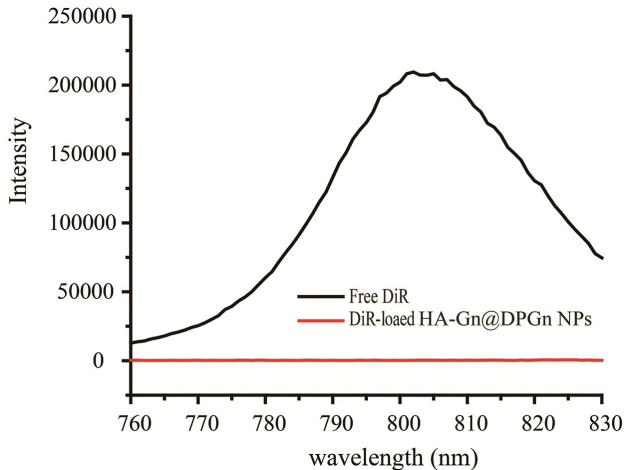

Supplement: c9bm00674e17.pdf [file c9bm00674e17.pdf]

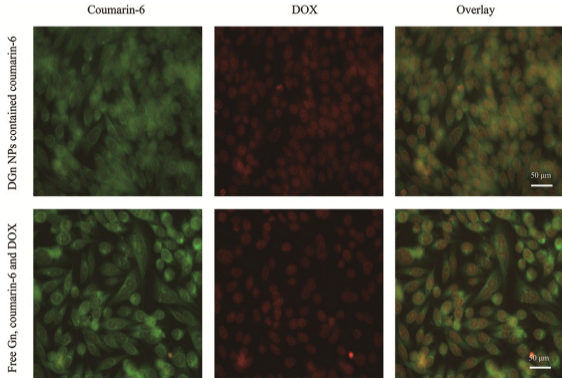

Supplement: c9bm00674e18.pdf [file c9bm00674e18.pdf]

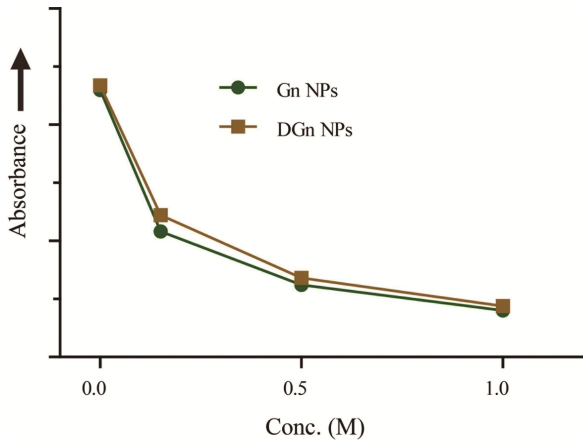

Supplement: c9bm00674e19.pdf [file c9bm00674e19.pdf]

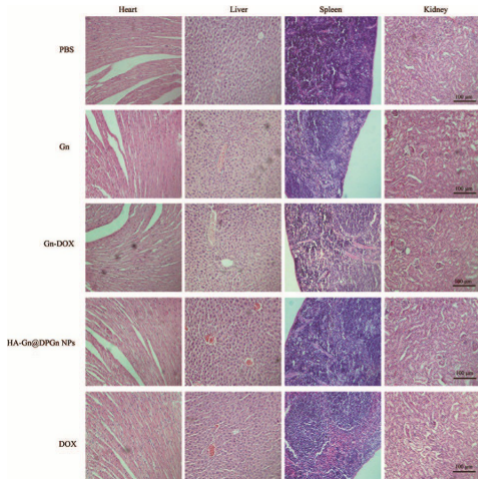

Supplement: c9bm00674e2.pdf [file c9bm00674e2.pdf]

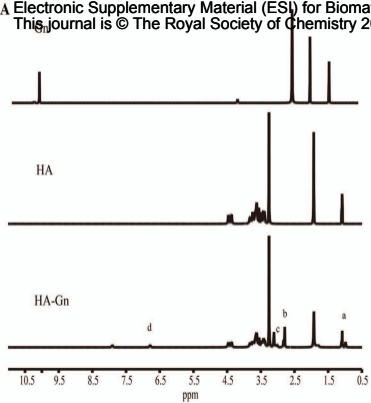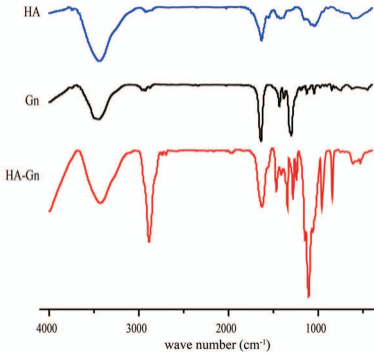

Supplement: c9bm00674e3.pdf [file c9bm00674e3.pdf]

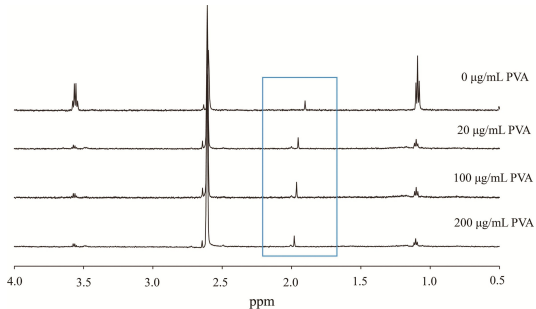

Supplement: c9bm00674e5.pdf [file c9bm00674e5.pdf]

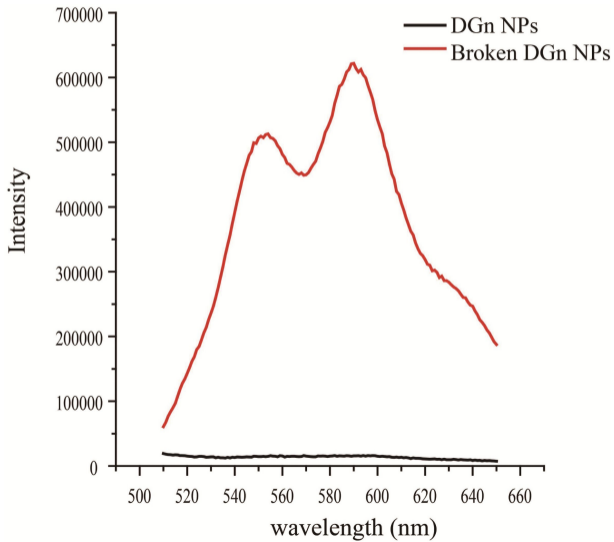

Supplement: c9bm00674e6.pdf [file c9bm00674e6.pdf]

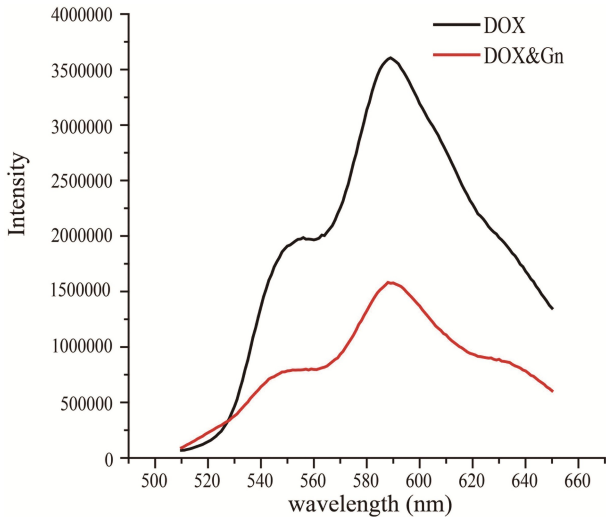

Supplement: c9bm00674e7.pdf [file c9bm00674e7.pdf]

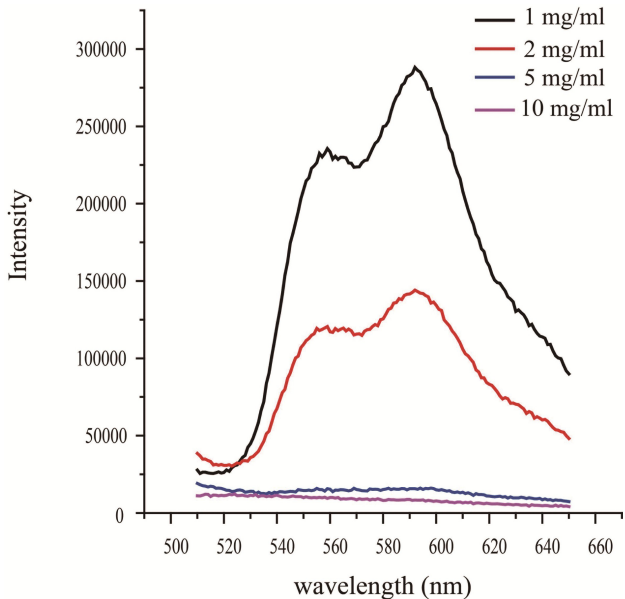

Supplement: c9bm00674e8.pdf [file c9bm00674e8.pdf]

**A**

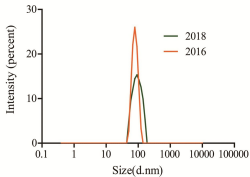

**B**

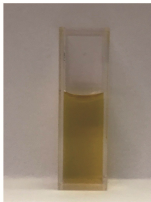

Supplement: c9bm00674e9.pdf [file c9bm00674e9.pdf]
